# Supplementary material for: The Gut Microbiome as a Promising Biomarker of Cancer Progression Among Female Never-smokers With Lung Adenocarcinoma
Source: Research Square preprint supplement (doi:10.21203/rs.3.rs-167665/v1), 2021-02-05
Supplement: Supplementary file 1 [file 90d656b4f398e4ac95dd7fd5.xlsx]

## Sheet: Supplementary information
Patient	Age	BMI	T	T_n	N	M	M_01	Stage	Stage_n	tumor size	PS	PS_01	Antibiotics within 3months	Antibiotics within 1month	EGFR	Observed	Chao1	se.chao1	Shannon	Simpson	Fisher	D:1::Tenericutes_NA_NA_NA_NA_NA	D:1::Actinobacteria_NA_NA_NA_NA_NA	D:1::Bacteroidetes_NA_NA_NA_NA_NA	D:1::Deferribacteres_NA_NA_NA_NA_NA	D:1::Saccharibacteria_NA_NA_NA_NA_NA	D:1::Cyanobacteria_NA_NA_NA_NA_NA	D:1::Euryarchaeota_NA_NA_NA_NA_NA	D:1::Lentisphaerae_NA_NA_NA_NA_NA	D:1::Synergistetes_NA_NA_NA_NA_NA	D:1::Verrucomicrobia_NA_NA_NA_NA_NA	D:1::Proteobacteria_NA_NA_NA_NA_NA	D:1::Firmicutes_NA_NA_NA_NA_NA	D:1::Fusobacteria_NA_NA_NA_NA_NA	D:1::Firmicutes_D:2::Negativicutes_NA_NA_NA_NA	D:1::Firmicutes_D:2::Erysipelotrichia_NA_NA_NA_NA	D:1::Firmicutes_D:2::Bacilli_NA_NA_NA_NA	D:1::Tenericutes_D:2::Mollicutes_NA_NA_NA_NA	D:1::Actinobacteria_D:2::Actinobacteria_NA_NA_NA_NA	D:1::Actinobacteria_D:2::Coriobacteriia_NA_NA_NA_NA	D:1::Bacteroidetes_D:2::Bacteroidia_NA_NA_NA_NA	D:1::Proteobacteria_D:2::Alphaproteobacteria_NA_NA_NA_NA	D:1::Deferribacteres_D:2::Deferribacteres_NA_NA_NA_NA	D:1::Proteobacteria_D:2::Betaproteobacteria_NA_NA_NA_NA	D:1::Proteobacteria_D:2::Deltaproteobacteria_NA_NA_NA_NA	D:1::Saccharibacteria_D:2::uncultured bacterium_NA_NA_NA_NA	D:1::Cyanobacteria_D:2::Chloroplast_NA_NA_NA_NA	D:1::Cyanobacteria_D:2::Melainabacteria_NA_NA_NA_NA	D:1::Euryarchaeota_D:2::Thermoplasmata_NA_NA_NA_NA
KBR0053	75	23.9224	4	4	0	0	0	3A	7	88	0	0	O	X	X	636	1239.45	97.7103	4.43918	0.970729	151.182	21	569	4224	0	0	0	4	46	221	36	906	3937	29	277	35	35	21	423	146	4223	0	0	46	83	0	0	0	2
KBR0052	58	19.313	is	0	0	0	0	0	0	0	0	0	X	X	O	602	1043.85	69.2323	3.89367	0.930167	140.74	0	132	6451	0	0	0	0	0	0	49	348	2967	52	586	5	59	0	86	46	6451	0	0	241	66	0	0	0	0
KBR0054	65	24.0344	1a	1	0	0	0	1A1	1	6	0	0	X	X	O	593	1445.5	141.184	4.2555	0.9679	138.013	0	144	2892	0	1	0	0	0	0	20	423	6518	0	112	216	64	0	114	30	2892	0	0	89	11	1	0	0	0
KBR0007	71	20.2694	1a	1	0	0	0	1A1	1	10	1	1	X	X	O	434	769.162	63.8148	3.58299	0.932857	92.4888	0	32	2920	0	0	0	0	0	0	0	2297	4686	65	145	97	28	0	16	16	2920	0	0	15	0	0	0	0	0
KBR0001	68	23.8728	2a	2	0	0	0	1B	4	15	0	0	X	X	O	594	1126.87	86.5759	3.93292	0.92414	138.315	0	476	5004	0	0	0	0	0	0	0	132	4377	0	438	55	11	0	76	400	5004	0	0	0	62	0	0	0	0
KBR0011	66	17.8536	2a	2	1	0	0	2B	6	25	0	0	X	X	O	467	847.676	69.9389	3.45303	0.876158	101.517	0	886	5043	0	0	0	0	0	0	0	237	3760	54	392	73	785	0	667	219	5043	0	0	0	0	0	0	0	0
KBR0002	72	24.4511	4	4	3	1c	1	4B	11	58	1	1	X	X	X	558	954.765	64.3598	3.65395	0.933457	127.559	0	735	2670	0	0	0	0	2	1	0	34	6555	0	139	3	9	0	727	8	2670	0	0	21	7	0	0	0	0
KBR0016	69	21.5045	1mi	1	0	0	0	1A1	1	1	0	0	X	X	X	300	651.029	84.0771	2.43669	0.76207	58.2333	0	1130	4987	0	0	0	0	0	0	153	180	3528	0	1404	60	59	0	1115	15	4987	0	0	0	0	0	0	0	0
KBR0012	62	28.7201	1a	1	0	0	0	1A1	1	10	1	1	X	X	X	472	796.172	57.3742	3.6842	0.925453	102.905	0	488	6225	0	2	0	0	0	0	0	284	2907	87	441	9	28	0	250	238	6225	0	0	272	10	2	0	0	0
KBR0006	47	24.974	3	3	0	0	0	2B	6	35	1	1	X	X	X	381	803.938	87.3584	3.20299	0.896114	78.4683	0	523	3708	0	0	0	0	0	0	0	209	5557	0	358	74	42	0	514	9	3708	0	0	164	0	0	0	0	0
KBR0009	70	23.9257	1b	1	0	0	0	1A2	2	12	1	1	X	X	O	476	916.151	78.2341	3.7036	0.919634	104.018	0	204	5083	0	1	0	0	0	0	0	632	4077	0	230	54	47	0	126	78	5083	0	0	607	9	1	0	0	0
KBR0017	67	22.4813	2b	2	2	1c	1	4B	11	46	0	0	O	O	O	602	972.29	59.9295	4.18559	0.952102	140.74	0	103	5513	0	0	1	0	0	0	0	253	4129	0	198	15	67	0	85	18	5513	0	0	1	22	0	1	0	0
KBR0057	77	22.3543	2a	2	1	0	0	2B	6	31	0	0	X	X	O	404	751.286	65.1034	3.29033	0.909205	84.4791	0	21	3627	0	0	0	0	0	0	2	162	6132	54	31	3	50	0	2	19	3627	0	0	0	0	0	0	0	0
KBR0003	76	22.6409	2a	2	2	0	0	3A	7	36	1	1	X	X	O	688	1095.5	60.9819	4.34893	0.968908	167.58	0	1057	3670	0	0	0	0	0	13	558	221	4445	25	276	38	320	0	946	111	3668	0	0	101	19	0	0	0	0
KBR0020	82	23.3089	2a	2	0	0	0	1B	4	36	2	1	X	X	O	701	1281.64	86.7933	4.23317	0.952294	171.76	0	356	5135	0	0	0	0	0	1	116	199	4171	0	76	41	8	0	183	173	5135	0	0	192	7	0	0	0	0
KBR0028	79	22.2222	1mi	1	0	0	0	1A1	1	5	0	0	X	X	O	689	840.509	26.7253	4.73817	0.977448	167.901	0	253	5050	0	0	0	0	0	0	786	80	3826	0	48	4	61	0	220	33	5050	0	0	66	6	0	0	0	0
KBR0018	64	16.8242	1b	1	1	0	0	2B	6	18	1	1	X	X	O	404	731.435	64.5164	3.23717	0.868512	84.4791	0	251	6724	0	0	0	0	0	0	0	41	2576	403	64	5	373	0	237	14	6724	0	0	0	19	0	0	0	0
KBR0025	77	28.3771	1c	1	0	0	0	1A3	3	21	0	0	X	X	O	685	710.755	7.37434	4.17521	0.891606	166.62	0	708	933	2	0	0	0	0	0	33	3907	4374	0	52	97	744	0	402	306	918	0	2	128	12	0	0	0	0
KBR0021	73	24.5578	is	0	0	0	0	0	0	0	0	0	X	X		344	644.068	67.2539	3.6849	0.940908	69.0415	0	1945	4324	0	0	0	0	0	0	0	150	3576	4	23	140	34	0	1596	349	4324	0	0	117	31	0	0	0	0
KBR0032	56	19.6506	1c	1	0	0	0	1A3	3	21	0	0	X	X	O	521	803.03	49.1114	3.48126	0.876167	116.771	0	194	2688	0	0	0	0	0	0	0	3515	3601	0	108	22	314	0	13	181	2688	0	0	0	0	0	0	0	0
KBR0030	71	24.3496	2a	2	0	0	0	1B	4	17	0	0	X	X	O	635	730.156	18.9618	4.29758	0.957541	150.871	0	189	4564	0	0	0	0	0	1	0	49	5168	0	132	15	5	0	183	6	4564	0	0	0	3	0	0	0	0
KBR0022	63	23.3726	1c	1	0	0	0	1A3	3	21	0	0	X	X	X	643	1179	81.7096	3.93892	0.938274	153.359	0	8	5758	0	0	0	0	0	0	1	1309	2903	0	604	10	7	0	1	7	5758	0	0	58	25	0	0	0	0
KBR0033	59	19.2277	4	4	3	1a	1	4A	10	55	1	1	O	O	X	421	799.424	71.3019	3.49577	0.9294	88.9946	0	526	4980	0	0	0	0	0	0	0	65	4425	0	653	104	112	0	506	20	4980	0	0	0	1	0	0	0	0
KBR0038	75	16.8802	2a	2	2	0	0	3A	7	32	0	0	X	X	X	335	602.105	56.0079	2.87319	0.862156	66.7946	0	5	6905	0	0	0	0	0	0	0	786	2233	68	4	63	7	0	1	4	6905	0	0	342	0	0	0	0	0
KBR0042	58	20.7008	1c	1	0	0	0	1A3	3	25	0	0	X	X	O	452	836.197	74.1466	3.71042	0.930692	97.3853	0	808	4325	0	0	0	0	0	0	0	166	4698	1	1566	15	8	0	658	150	4317	0	0	136	28	0	0	0	0
KBR0045	64	25.5588	1b	1	0	0	0	1A2	2	11	0	0	X	X	X	279	468.808	43.5731	2.54397	0.813009	53.2347	0	3723	3569	0	0	0	0	0	0	0	194	2511	2	209	12	105	0	3491	232	3569	0	0	70	5	0	0	0	0
KBR0043	80	22.2222	2a	2	0	0	0	1B	4	33	0	0	X	X	X	578	1249.01	113.565	4.18561	0.958371	133.503	0	345	3431	0	0	0	0	0	0	0	275	5947	1	122	19	56	0	283	62	3427	194	0	79	1	0	0	0	0
KBR0039	78	24.2568	1b	1	0	0	0	1A2	2	17	0	0	X	X	O	428	803.444	71.9418	3.4334	0.899524	90.8717	0	338	6853	0	1	0	0	0	0	0	554	1993	260	46	15	8	0	331	7	6853	0	0	470	0	1	0	0	0
KBR0035	74	25.2241	1mi	1	0	0	0	1A1	1	5	0	0	X	X	O	778	1424.77	90.4225	4.47446	0.966616	197.172	0	907	2644	0	0	0	0	0	0	0	420	6022	0	99	33	662	0	866	41	2644	0	0	136	4	0	0	0	0
KBR0049	73	20.4082	4	4	3	1c	1	4B	11	75	1	1	X	X	X	549	845.26	51.7313	4.33545	0.968746	124.91	0	1483	2652	0	0	0	0	1	17	0	354	5489	2	336	34	510	0	1266	217	2652	0	0	195	18	0	0	0	0
KBR0046	56	20.9644	1b	1	0	0	0	1A2	2	18	0	0	X	X	O	402	790.143	76.9902	3.45559	0.873602	83.9519	0	44	5299	0	0	0	0	0	0	3	628	4003	19	339	57	4	0	26	18	5299	178	0	380	70	0	0	0	0
KBR0044	68	20.0877	2a	2	0	0	0	1B	4	33	0	0	O	O	X	488	881.887	71.9573	3.95318	0.947531	107.379	0	2822	1621	0	0	1	0	0	0	0	312	5244	0	48	22	42	0	2012	810	1621	0	0	141	137	0	1	0	0
KBR0041	70	20.7369	1b	1	0	0	0	1A2	2	17	0	0	X	X	X	700	1222.85	79.5472	4.41947	0.962268	171.438	25	26	2481	0	0	1	0	0	113	589	592	6170	0	91	24	15	25	1	25	2481	50	0	49	108	0	0	1	0
KBR0050	70	18.9745	3	3	0	0	0	2B	6	32	0	0	X	X	X	388	665.759	57.5236	3.83863	0.942367	80.2856	0	257	4343	0	0	0	0	0	0	0	509	4888	0	188	29	758	0	176	81	4343	0	0	287	12	0	0	0	0
KBR0037	84	20.4082	1c	1	0	0	0	1A3	3	22	0	0	X	X	X	275	525.591	57.8138	2.7596	0.8614	52.2947	0	1822	3595	0	0	0	0	0	0	0	505	4076	0	976	1	643	0	1633	189	3595	0	0	0	0	0	0	0	0
KBR0058	82	18.718	1c	1	0	0	0	1A3	3	25	0	0	X	X	X	449	985.034	99.5109	3.85874	0.955596	96.5646	0	1507	4018	0	1	0	0	0	0	1	328	4141	1	439	15	25	0	1192	315	4018	0	0	279	34	1	0	0	0
KBR0055	66	25.0657	2a	2	2	0	0	3A	7	32	0	0	X	X	O	514	946.842	76.1111	3.77851	0.903649	114.76	0	74	5852	0	0	42	0	5	0	131	256	3633	0	209	138	12	0	0	74	5852	0	0	72	55	0	0	42	0
[truncated: 338 more columns]
